# Supplementary material for: Syntheses of novel pyridine-based low-molecular-weight luminogens possessing aggregation-induced emission enhancement (AIEE) properties
Source: publisher site journal article supplement (doi:10.3762/bjoc.18.60), 2022-05-24
Supplement: Additional file 1 [file 1860-5397-18-60-S1.pdf]

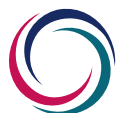

## Supporting Information

for

### **Syntheses of novel pyridine-based low-molecular-weight luminogens possessing aggregation-induced emission enhancement (AIEE) properties**

Masayori Hagimori, Tatsusada Yoshida, Yasuhisa Nishimura, Yukiko Ogawa  
and Keitaro Tanaka

*Beilstein J. Org. Chem.* **2022**, *18*, 580–587. [doi:10.3762/bjoc.18.60](https://doi.org/10.3762/bjoc.18.60)

**General information, synthesis of 3a,b, and 4a–e, experimental procedure of fluorescence, theoretical computation method measurements, NMR, UV–vis, and fluorescence spectra**

## Table of contents

|                                                        |     |
|--------------------------------------------------------|-----|
| 1. General information                                 | S1  |
| 2. Synthesis of <b>3a,b</b> , and <b>4a–e</b>          | S1  |
| 3. Experimental procedure of fluorescence measurements | S3  |
| 4. Theoretical computation methods                     | S3  |
| 5. NMR spectra (Figures S1–S14)                        | S4  |
| 6. UV–vis absorption spectra (Figures S15–S17)         | S11 |
| 7. Fluorescence spectra (Figures S18–S20)              | S12 |
| 8. References                                          | S14 |

## 1. General information

The prepared compounds were identified based on NMR spectra recorded on a Gemini 300 NMR (300 MHz), a JEOL JNM-AL400 (400 MHz), and a JEOL JNM ECP500 (500 MHz) instrument, using tetramethylsilane as the internal standard. Mass spectra were recorded on a JEOL DX-303 mass spectrometer. FTIR spectra were recorded on a Shimadzu IRAffinity-1. UV absorption spectra were measured using a Shimadzu UV-2450 spectrophotometer. Fluorescence properties were determined by recording their fluorescence spectra on a Shimadzu RF-5300 pc spectrofluorometer. Melting points were measured using a Yanaco MP-500D melting point apparatus. All chemicals were of reagent grade and were used as received without further purification unless otherwise specified.

## 2. Synthesis of 3a,b, and 4a–e

### 2.1. 10-Imino-2-methylpyrido[1,2-*a*]pyrrolo[3,4-*d*]pyrimidine-1,3(2*H*,10*H*)-dione (3a)

A solution of 0.287 g (3.0 mmol) of 1-methyl-4-(methylsulfanyl)-2,5-dioxo-2,5-dihydro-1*H*-pyrrole-3-carbonitrile (**1**) [1,2] and 0.541 g (3.0 mmol) of 2-aminopyridine (**2a**) in 30 mL of ethanol was refluxed for 2 h. After cooling, the precipitate that appeared was collected by filtration to give 0.664 g (2.91 mmol) orange needles, mp 193-194 °C, in 97% yield. <sup>1</sup>H NMR (300 MHz, DMSO-*d*<sub>6</sub>) δ: 2.96 (3H, s, NMe), 7.25 (1H, dd, *J* = 2.4, 4.9 Hz, 8-H), 7.54 (1H, d, *J* = 8.2 Hz, 5-H), 7.88 (1H, dd, *J* = 1.1, 1.8, 8.2 Hz, 6-H), 8.41 (1H, ddd, *J* = 1.1, 4.9, 6.0 Hz, 7-H), 11.36 (1H, s, NH). <sup>13</sup>C NMR (75 MHz, CDCl<sub>3</sub>) δ: 59.0, 113.7, 147.8, 150.5, 152.0, 176.0, 177.5, 182.0, 183.9. IR (KBr, cm<sup>-1</sup>): 3286 (HN=), 1699 (CO), 1664 (CO). Ms: *m/z* 229 (*M*<sup>+</sup>+1, 14), 228 (*M*<sup>+</sup>, 100), 136 (17), 143 (96), 78 (86). *Anal.* Calcd for C<sub>11</sub>H<sub>8</sub>N<sub>4</sub>O<sub>2</sub>=228.0647: C, 57.89; H, 3.53; N, 24.55. Found: C, 57.88; H, 3.32; N, 24.92.

### 2.2. 10-Imino-2,7-dimethylpyrido[1,2-*a*]pyrrolo[3,4-*d*]pyrimidine-1,3(2*H*,10*H*)-dione (3b)

This compound was prepared in 86% yield from 0.18 g (1.0 mmol) of **1** and 0.11 g (1.0 mmol) of 5-methylpyridin-2-amine (**2b**) in a manner similar to that described for synthesis of **3a**. An analytical sample was recrystallized from methanol to give orange needles, mp 180-181 °C. <sup>1</sup>H NMR (300 MHz, DMSO-*d*<sub>6</sub>) δ: 2.31 (3H, s, 7-Me), 2.95 (3H, s, NMe), 7.44 (1H, d, *J* = 6.0 Hz, 8-H), 7.71 (1H, dd, *J* = 2.3, 6.0 Hz, 6-H), 7.99 (1H, d, *J* = 2.3 Hz, 5-H), 11.23 (1H, s, NH). <sup>13</sup>C NMR (75 MHz, CDCl<sub>3</sub>) δ: 51.9, 58.9, 112.1, 148.0, 149.8, 164.9, 173.9, 177.7, 181.4, 182.7. IR (KBr, cm<sup>-1</sup>): 3277 (HN=), 1701 (CO), 1685 (CO). Ms: *m/z* 242 (*M*<sup>+</sup>). HRMS (EI): 242.0804 (Calcd. 242.0804 for C<sub>12</sub>H<sub>10</sub>N<sub>4</sub>O<sub>2</sub>).

### 2.3. 4-((5-Bromopyridin-2-yl)amino)-1-methyl-2,5-dioxo-2,5-dihydro-1H-pyrrole-3-carbonitrile (4a)

This compound was prepared in 72% yield from 0.18 g (1.0 mmol) of **1** and 0.17 g (1.0 mmol) of 2-amino-5-bromopyridine (**2c**) in a manner similar to that described for synthesis of **3a**. An analytical sample was recrystallized from methanol to give yellow needles, mp 252-253 °C. <sup>1</sup>H NMR (400 MHz, DMSO-*d*<sub>6</sub>) δ: 2.96 (3H, s, NMe), 7.51 (1H, d, *J* = 8.7 Hz, 3-H), 8.12 (1H, d, *J* = 8.7 Hz, 4-H), 8.48 (1H, s, 6-H), 11.46 (1H, s, NH). <sup>13</sup>C NMR (100 MHz, DMSO-*d*<sub>6</sub>) δ: 24.3, 79.0, 113.2, 115.9, 117.2, 141.4, 142.8, 147.3, 149.2, 165.3, 169.0. IR (KBr, cm<sup>-1</sup>): 3221 (HN=), 2222 (CN), 1708 (CO), 1654 (CO). Ms: *m/z* 306 (M<sup>+</sup>+1). HRMS (EI): 305.9753 (Calcd. 305.9752 for C<sub>11</sub>H<sub>7</sub>BrN<sub>4</sub>O<sub>2</sub>).

### 2.4. 4-((5-Fluoropyridin-2-yl)amino)-1-methyl-2,5-dioxo-2,5-dihydro-1H-pyrrole-3-carbonitrile (4b)

This compound was prepared in 68% yield from 0.18 g (1.0 mmol) of **1** and 0.11 g (1.0 mmol) of 2-amino-5-fluoropyridine (**2d**) in a manner similar to that described for synthesis of **3a**. An analytical sample was recrystallized from methanol to give yellow needles, mp 220-221 °C. <sup>1</sup>H NMR (400 MHz, DMSO-*d*<sub>6</sub>) δ: 2.95 (3H, s, NMe), 7.59 (1H, d, *J* = 5.8 Hz, 3-H), 7.87 (1H, d, *J* = 5.8 Hz, 4-H), 8.38 (1H, s, 6-H), 11.63 (1H, s, NH). <sup>13</sup>C NMR (100 MHz, DMSO-*d*<sub>6</sub>) δ: 24.3, 77.7, 113.3, 117.3, 126.4, 134.2, 134.5, 143.3, 146.6, 165.3, 169.2. IR (KBr, cm<sup>-1</sup>): 3226 (HN=), 2218 (CN), 1718 (CO), 1654 (CO). Ms: *m/z* 246 (M<sup>+</sup>). HRMS (EI): 246.0553 (Calcd. 246.0553 for C<sub>11</sub>H<sub>7</sub>FN<sub>4</sub>O<sub>2</sub>).

### 2.5. 6-((4-Cyano-1-methyl-2,5-dioxo-2,5-dihydro-1H-pyrrol-3-yl)amino)nicotinonitrile (4c)

This compound was prepared in 32% yield from 0.18 g (1.0 mmol) of **1** and 0.12 g (1.0 mmol) of 2-amino-5-cyanopyridine (**2e**) in a manner similar to that described for synthesis of **3a**. An analytical sample was recrystallized from methanol to give yellow needles, mp 208-209 °C. <sup>1</sup>H NMR (500 MHz, DMSO-*d*<sub>6</sub>) δ: 2.92 (3H, s, NMe), 7.67 (1H, d, *J* = 11.0 Hz, 3-H), 8.31 (1H, d, *J* = 11.0 Hz, 4-H), 8.82 (1H, s, 6-H), 11.64 (1H, s, NH). <sup>13</sup>C NMR (125 MHz, DMSO-*d*<sub>6</sub>) δ: 24.3, 81.6, 104.6, 112.9, 115.0, 116.8, 142.0, 142.1, 150.7, 152.8, 165.3, 168.6. IR (KBr, cm<sup>-1</sup>): 3213 (HN=), 2225 (CN), 2218 (CN), 1718 (CO), 1685 (CO). Ms: *m/z* 253 (M<sup>+</sup>). HRMS (EI): 253.0599 (Calcd. 253.0600 for C<sub>12</sub>H<sub>7</sub>N<sub>5</sub>O<sub>2</sub>).

### 2.6. Methyl 6-((4-cyano-1-methyl-2,5-dioxo-2,5-dihydro-1H-pyrrol-3-yl)amino)nicotinate (4d)

This compound was prepared in 43% yield from 0.18 g (1.0 mmol) of **1** and 0.15 g (1.0 mmol) of methyl-6-aminonicotinate (**2f**) in a manner similar to that described for synthesis of **3a**. An analytical sample was recrystallized from methanol to give orange needles, mp 245-246 °C. <sup>1</sup>H NMR (400 MHz, DMSO-*d*<sub>6</sub>) δ: 2.95 (3H, s, NMe), 3.87 (3H, s, OMe), 7.62 (1H, d, *J* = 8.8 Hz, 3-H), 8.31 (1H, d, *J* = 7.3 Hz, 4-H), 8.84 (1H, s, 6-H), 11.64 (1H, s, NH). <sup>13</sup>C NMR (100 MHz, DMSO-*d*<sub>6</sub>) δ: 24.4, 52.4, 112.8, 114.7, 114.8, 121.8, 139.5, 147.9, 153.4, 164.6, 165.5, 169.0. IR (KBr, cm<sup>-1</sup>): 3221 (HN=), 2225 (CN), 1715 (CO), 1685 (CO). Ms: *m/z* 286 (M<sup>+</sup>). HRMS (EI): 286.0701 (Calcd. 286.0702 for C<sub>13</sub>H<sub>10</sub>N<sub>4</sub>O<sub>4</sub>).

## 2.7. Methyl 1-methyl-2,5-dioxo-4-((5-(trifluoromethyl)pyridin-2-yl)amino)-2,5-dihydro-1H-pyrrole-3-carbonitrile (**4e**)

This compound was prepared in 46% yield from 0.18 g (1.0 mmol) of **1** and 0.16 g (1.0 mmol) of 2-amino-5-(trifluoromethyl)-pyridine (**2g**) in a manner similar to that described for synthesis of **3a**. An analytical sample was recrystallized from methanol to give yellow needles, mp 216-217 °C. <sup>1</sup>H NMR (400 MHz, DMSO-*d*<sub>6</sub>) δ: 2.95 (3H, s, NMe), 7.70 (1H, d, *J* = 8.3 Hz, 3-H), 8.26 (1H, d, *J* = 6.3 Hz, 4-H), 8.67 (1H, s, 6-H), 11.65 (1H, s, NH). <sup>13</sup>C NMR (100 MHz, DMSO-*d*<sub>6</sub>) δ: 24.4, 81.0, 113.1, 115.2, 121.1, 124.8, 131.5, 142.4, 143.8, 153.4, 165.4, 168.9. IR (KBr, cm<sup>-1</sup>): 3170 (HN=), 2222 (CN), 1718 (CO), 1647 (CO). Ms: *m/z* 296 (M<sup>+</sup>). HRMS (EI): 296.00521 (Calcd. 296.0521 for C<sub>12</sub>H<sub>7</sub>F<sub>3</sub>N<sub>4</sub>O<sub>2</sub>).

## 3. Experimental procedure of fluorescence measurements

Each compound was dissolved in dimethyl sulfoxide (DMSO) to prepare stock solutions (10<sup>-2</sup> mol/L). The concentration of each sample was adjusted using a molar absorption coefficient of 0.05. The excitation wavelength was determined by scanning the emission wavelength. In a similar manner, the emission wavelength was obtained by scanning the excitation wavelength. Fluorescence quantum yields were determined using the Absolute PL Quantum Yield Measurement System (C9920-01) of Hamamatsu Photonics (Shizuoka, Japan).

## 4. Theoretical computation methods

Density functional theory (DFT)-based calculations were performed on compounds **3a** and **4e** using the Gaussian 16 program [3]. To geometrically optimize the monomer structure of each compound in the ground state, we used Becke's three-parameter hybrid exchange functional with the Lee-Yang-Parr gradient-corrected correlation (B3LYP) functional suitable for small organic molecules and the 6-31G(d,p) basis set. To evaluate the excitation energies, single-point energy calculations using time-dependent (TD) DFT were performed on ground-state optimized structures at the TD-B3LYP/6-311+G(d,p) level of theory. Both optimization and TDDFT calculations were performed in different solvent environments (dichloromethane, ethanol, and water) using the polarizable continuum model (PCM) based on the linear response approach.

## 5. NMR spectra (Figures S1–S14)

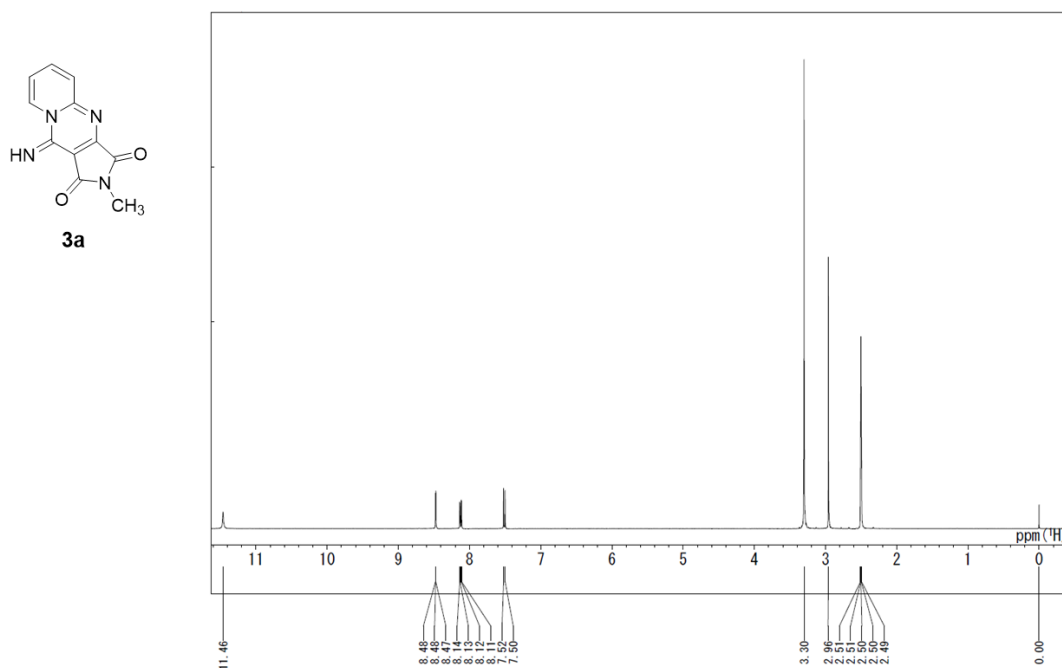

Figure S1.  $^1\text{H}$  NMR spectrum of **3a**

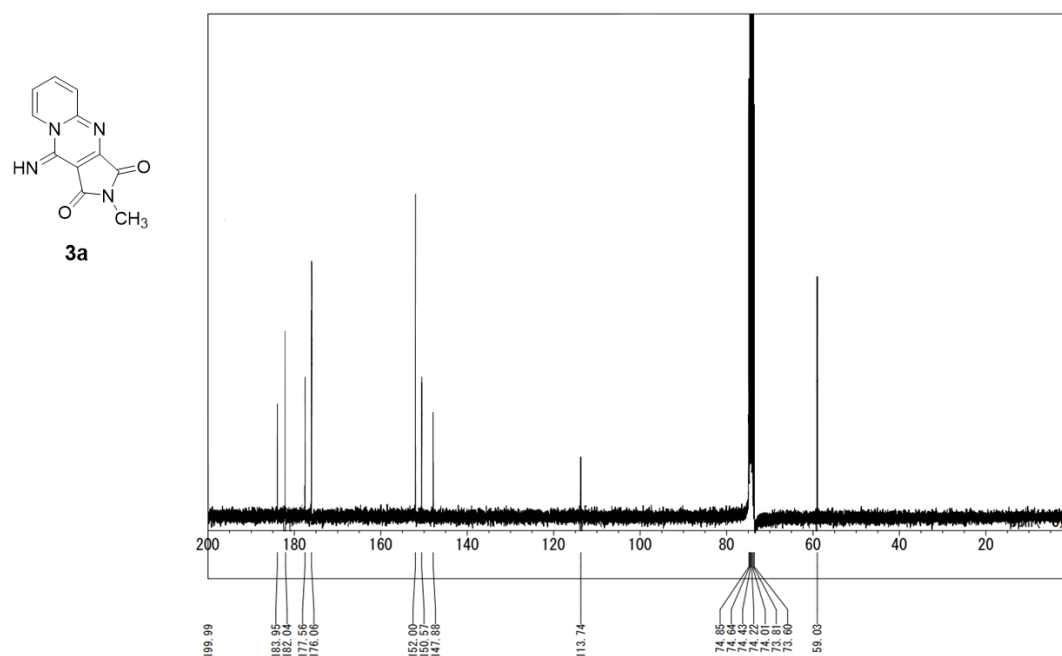

Figure S2.  $^{13}\text{C}$  NMR spectrum of **3a**

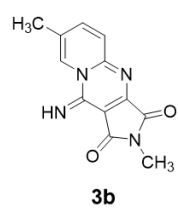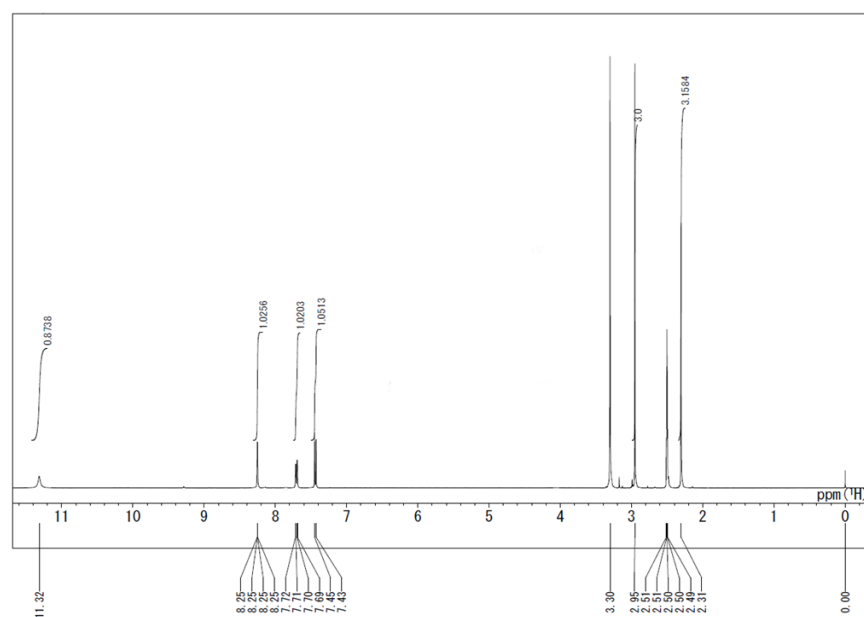

**Figure S3.** <sup>1</sup>H NMR spectrum of **3b**

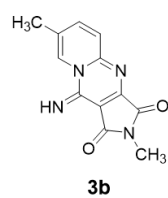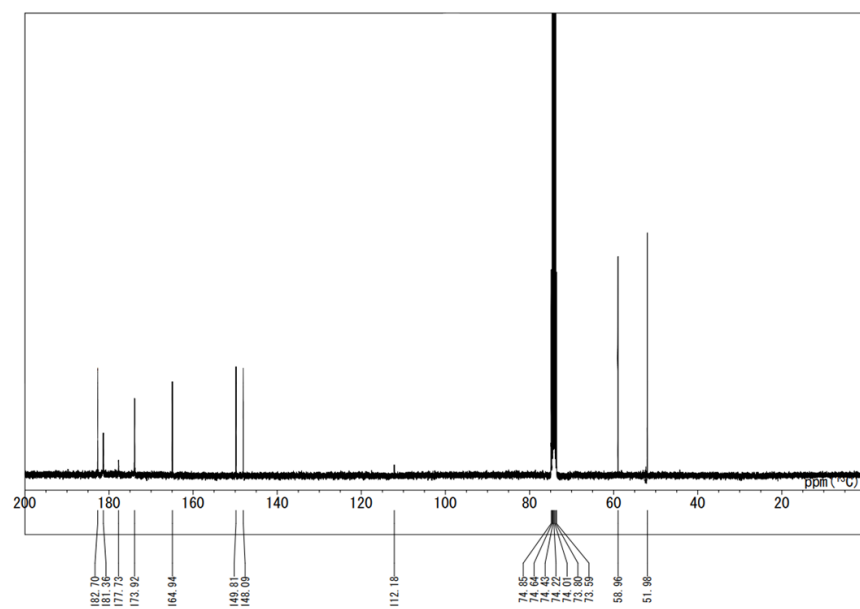

**Figure S4.** <sup>13</sup>C NMR spectrum of **3b**

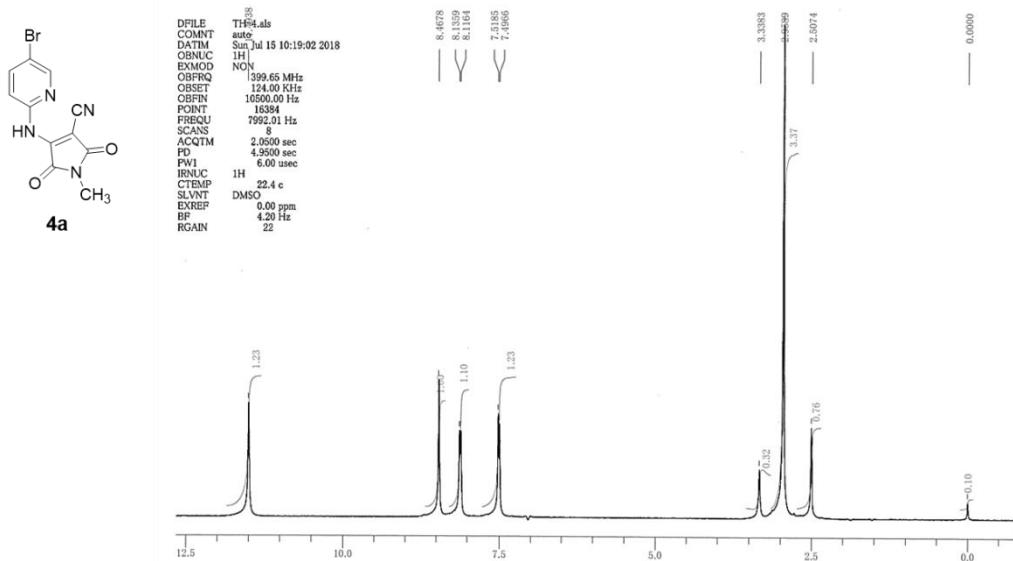

Figure S5.  $^1\text{H}$  NMR spectrum of **4a**

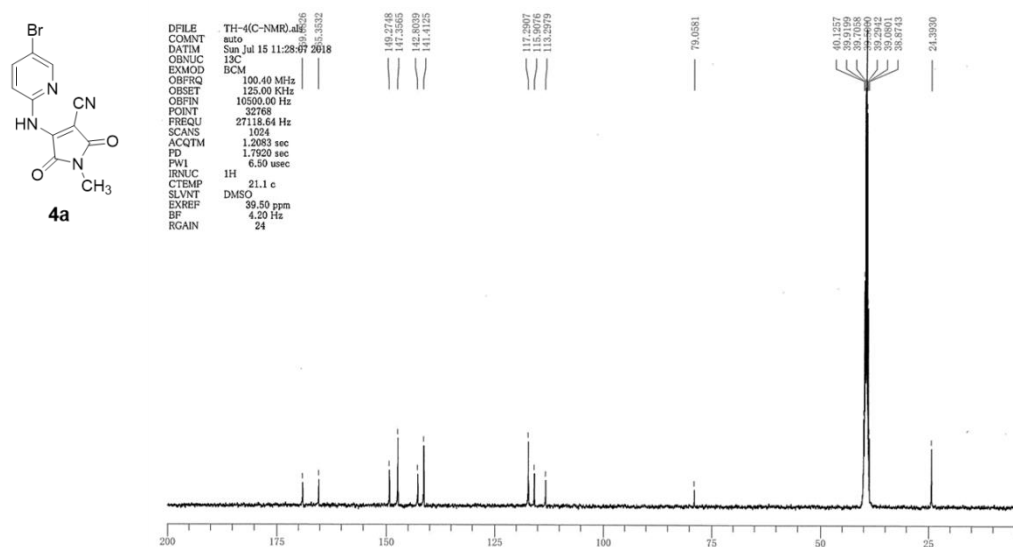

Figure S6.  $^{13}\text{C}$  NMR spectrum of **4a**



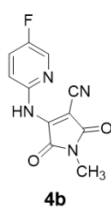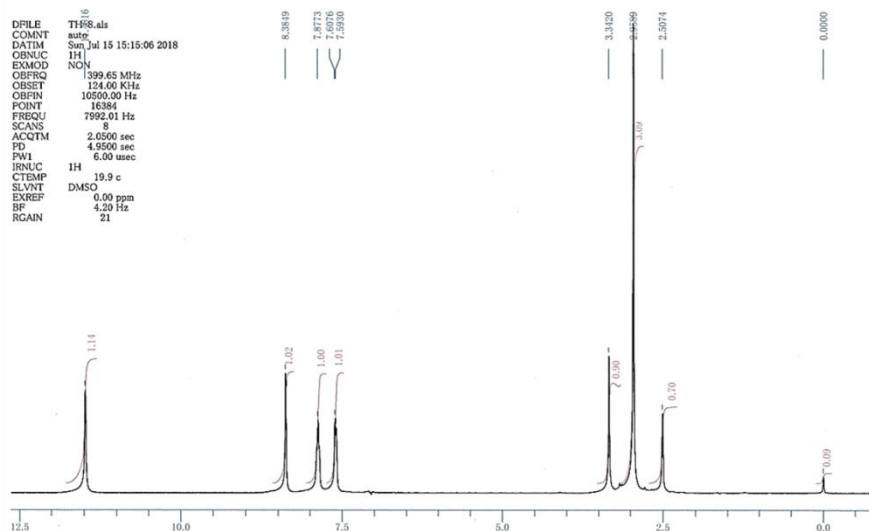

Figure S7. <sup>1</sup>H NMR spectrum of **4b**

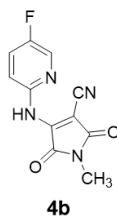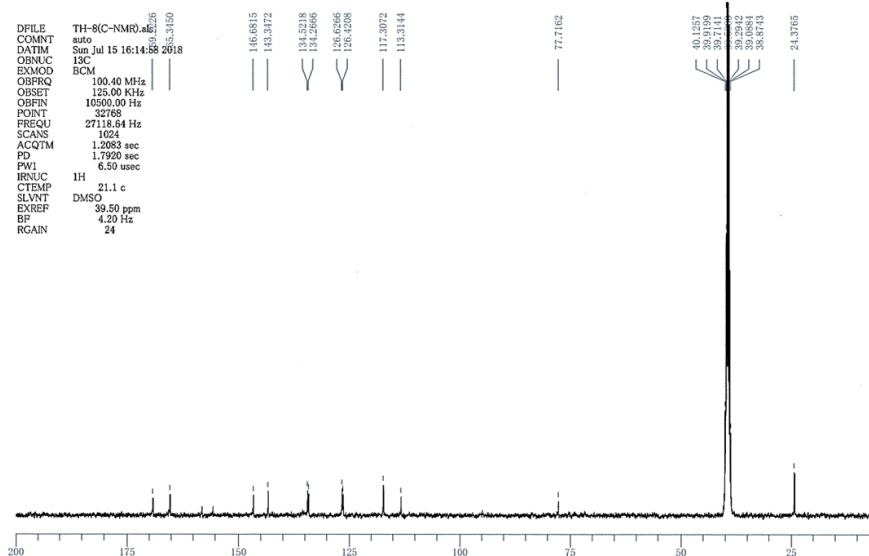

Figure S8. <sup>13</sup>C NMR spectrum of **4b**

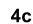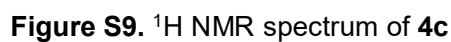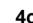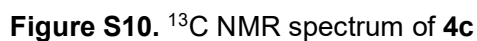

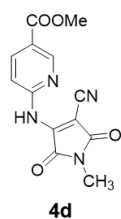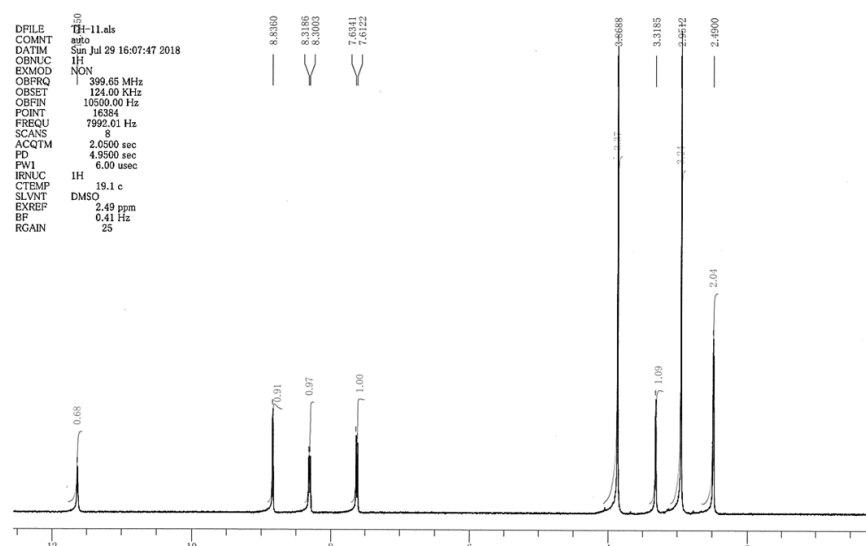

Figure S11. <sup>1</sup>H NMR spectrum of **4d**

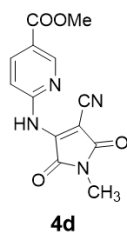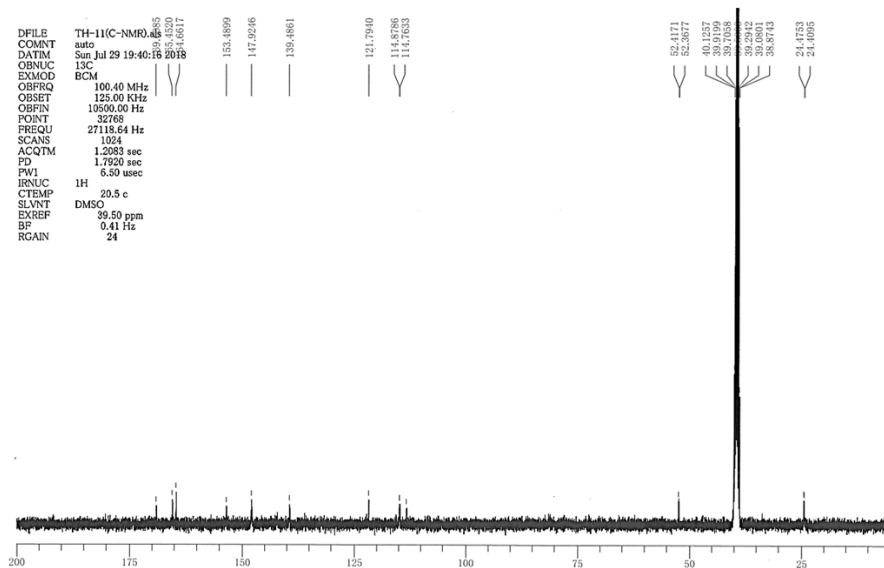



## 6. UV-vis absorption spectra (Figures S15–S17)

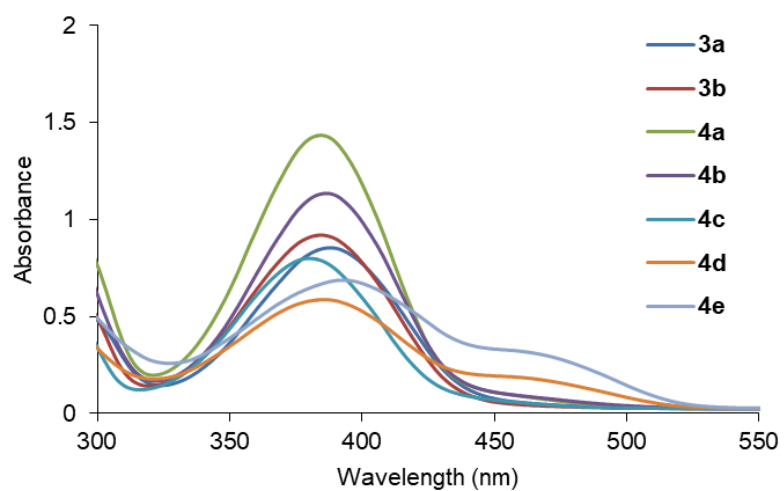

**Figure S15.** UV-vis absorption spectra of **3a**, **3b**, and **4a–e** (10  $\mu$ M) in EtOH.

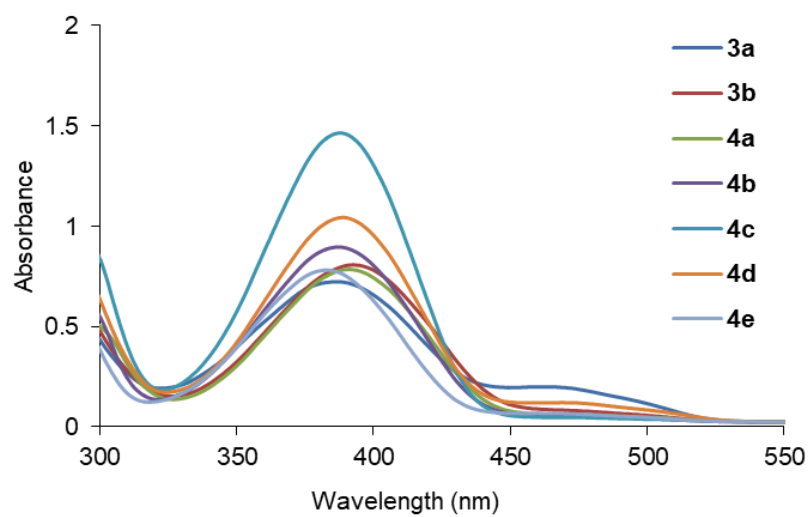

**Figure S16.** UV-vis absorption spectra of **3a**, **3b**, and **4a–e** (10  $\mu$ M) in DCM.

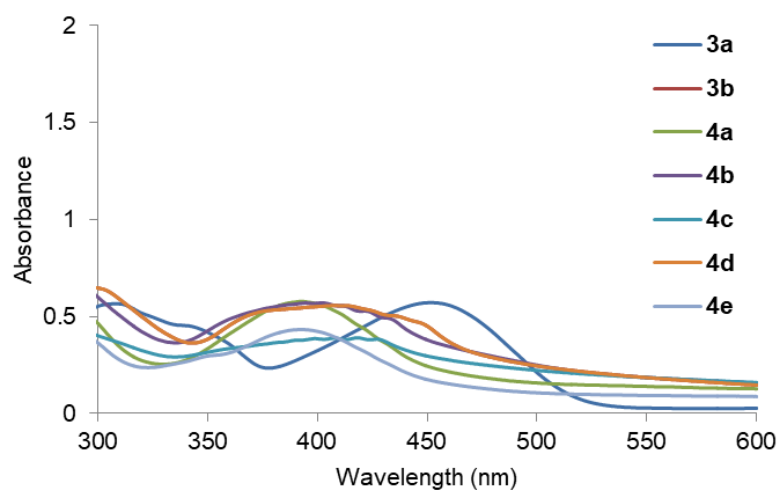

**Figure S17.** UV/Vis absorption spectra of **3a**, **3b** and **4a–e** (10 μM) in H<sub>2</sub>O.

## 7. Fluorescence spectra (Figures S18-S20)

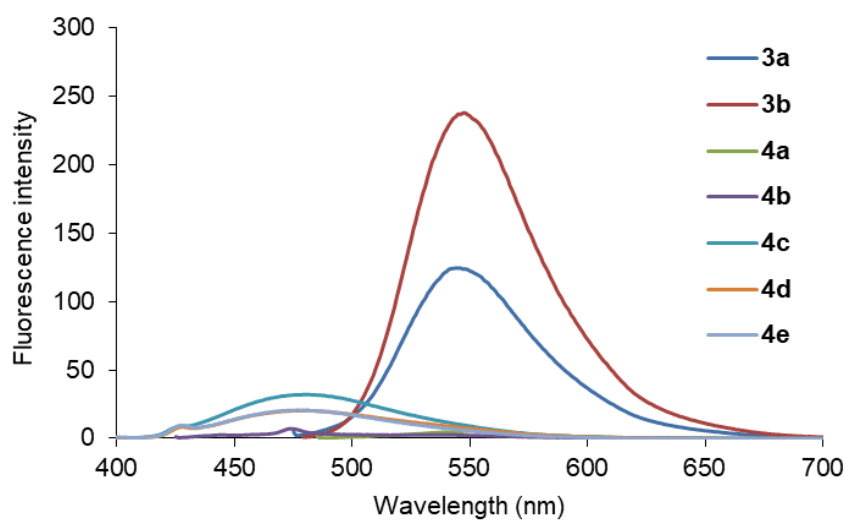

**Figure S18.** Fluorescence spectra of **3a**, **3b**, and **4a–e** (10 μM) in EtOH.

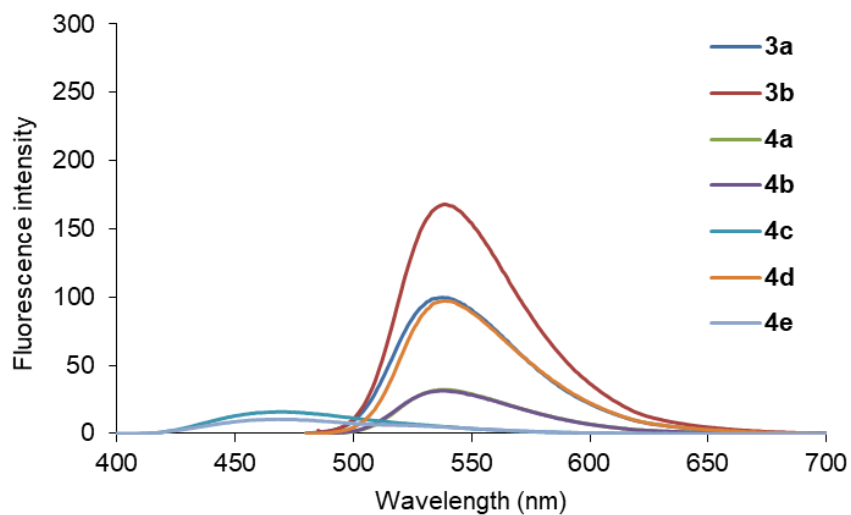

**Figure S19.** Fluorescence spectra of **3a**, **3b**, and **4a–e** (10  $\mu$ M) in DCM.

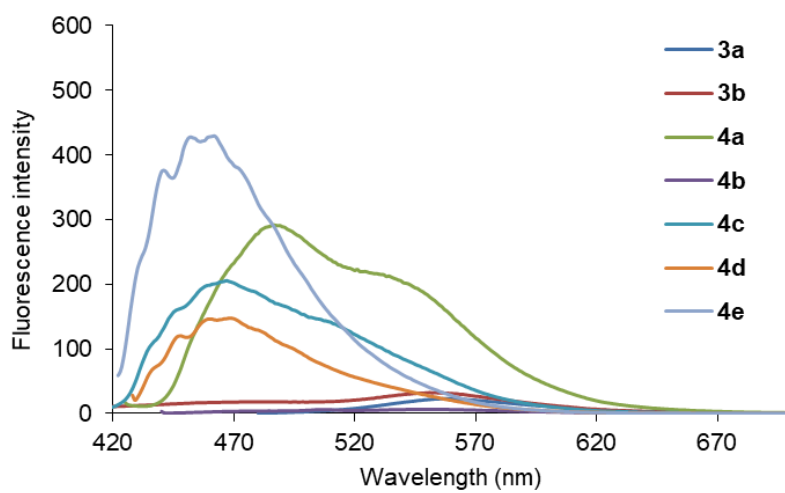

**Figure S20.** Fluorescence spectra of **3a**, **3b**, and **4a–e** (10  $\mu$ M) in H<sub>2</sub>O.

## 8. References

1. Shigemitsu, Y.; Komiya, K.; Mizuyama, N.; Hagimori, M.; Tominaga, Y. *Res. Lett. Org. Chem.* **2009**, 2009, 1–5.
2. Hagimori, M.; Mizuyama, N.; Yokota, K.; Morinaga, O.; Yamaguchi, Y.; Saji, H.; Tominaga, Y. *Heterocycles* **2011**, 83, 1983–1988.
3. Frisch, M. J.; Trucks, G. W.; Schlegel, H. B.; Scuseria, G. E.; Robb, M. A.; Cheeseman, J. R.; Scalmani, G.; Barone, V.; Petersson, G. A.; Nakatsuji, H.; Li, X.; Caricato, M.; Marenich, A. V.; Bloino, J.; Janesko, B. G.; Gomperts, R.; Mennucci, B.; Hratchian, H. P.; Ortiz, J. V.; Izmaylov, A. F.; Sonnenberg, J. L.; Williams-Young, D.; Ding, F.; Lipparini, F.; Egidi, F.; Goings, J.; Peng, B.; Petrone, A.; Henderson, T.; Ranasinghe, D.; Zakrzewski, V. G.; JGao, J.; Rega, N.; Zheng, G.; Liang, W.; Hada, M.; Ehara, M.; Toyota, K.; Fukuda, R.; Hasegawa, J.; Ishida, M.; Nakajima, T.; Honda, Y.; Kitao, O.; Nakai, H.; Vreven, T.; Throssell, K.; Montgomery Jr., J. A.; Peralta, J. E.; Ogliaro, F.; Bearpark, M. J.; Heyd, J. J.; Brothers, E. N.; Kudin, K. N.; Staroverov, V. N.; Keith, T. A.; Kobayashi, R.; Normand, J.; Raghavachari, K.; Rendell, A. P.; Burant, J. C.; Iyengar, S. S.; Tomasi, J.; Cossi, M.; Millam, J. M.; Klene, M.; Adamo, C.; Cammi, R.; Ochterski, J. W.; Martin, R. L.; Morokuma, K.; Farkas, O.; Foresman, J. B.; Fox, D. J. Gaussian16, Revision A.03. Gaussian, Inc., Wallingford, CT, **2016**.
